# Supplementary material for: Drosophila primary microRNA-8 encodes a microRNA-encoded peptide acting in parallel of miR-8
Source: PubMed Central journal article supplement (PMC8063413; doi:10.1186/s13059-021-02345-8), 2021-04-23
Supplement: 13059_2021_2345_MOESM5_ESM.pdf [file 13059_2021_2345_MOESM5_ESM.pdf]

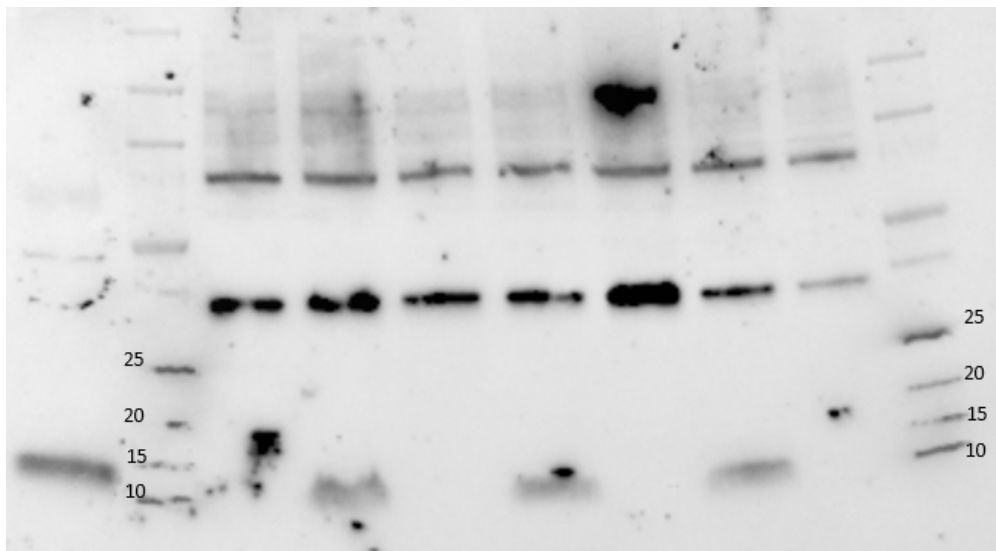

TnT ATG1 Marqueur NT miPEP8koz miPEP8kozMT PhiPhi PhiPhi MT milong milong MT Marqueur

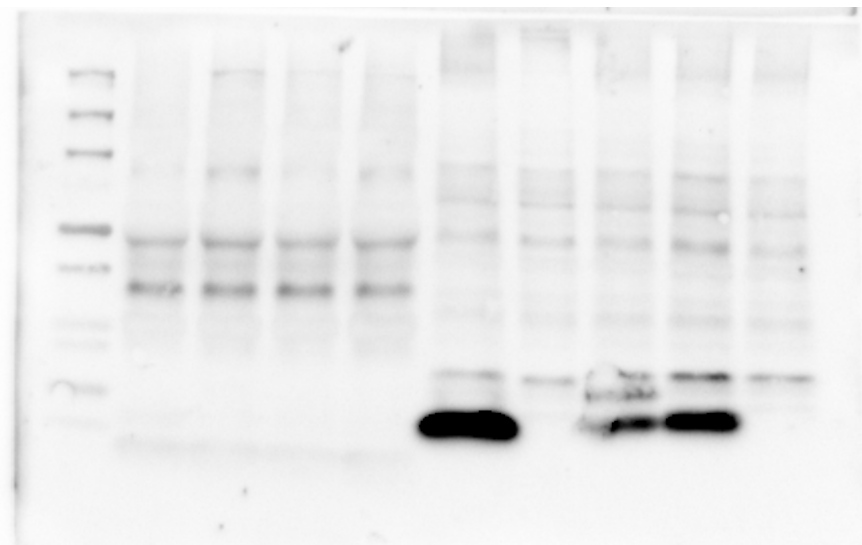

ATG1 - CTG ATG1 ATG2

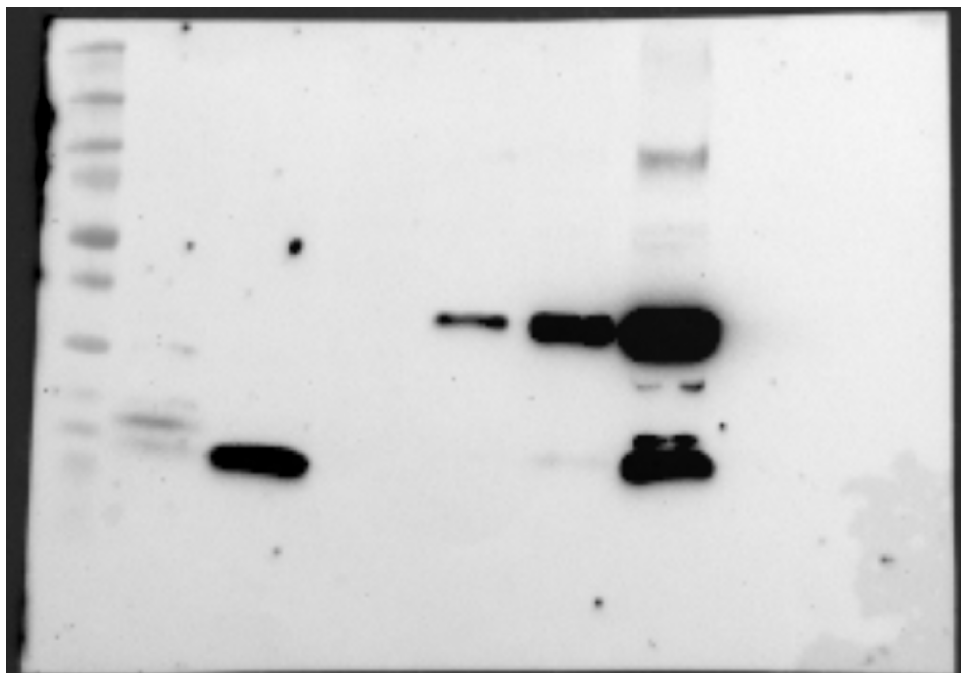

CTG ATG1 - 1µl 3µl 10µl D.mel (white)

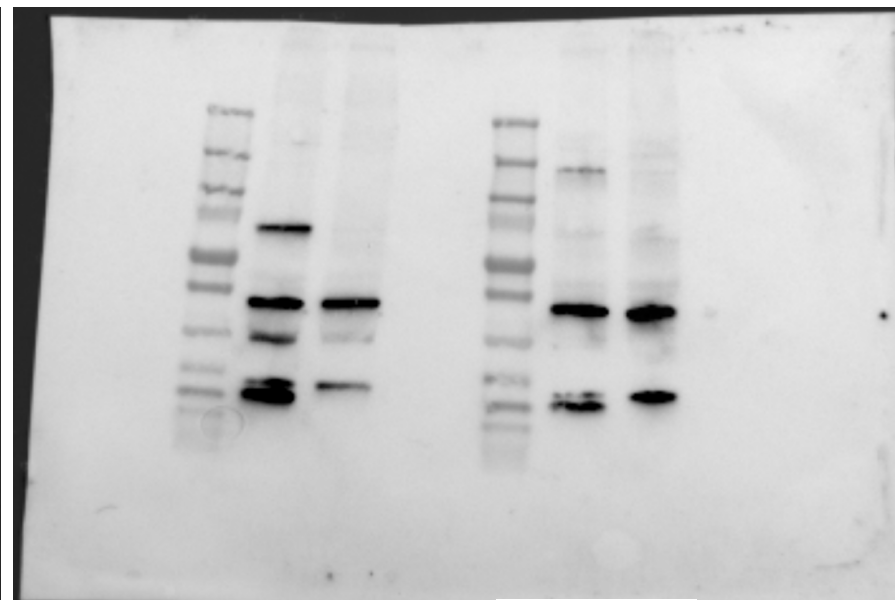

5µl white Δ2 white Δ2

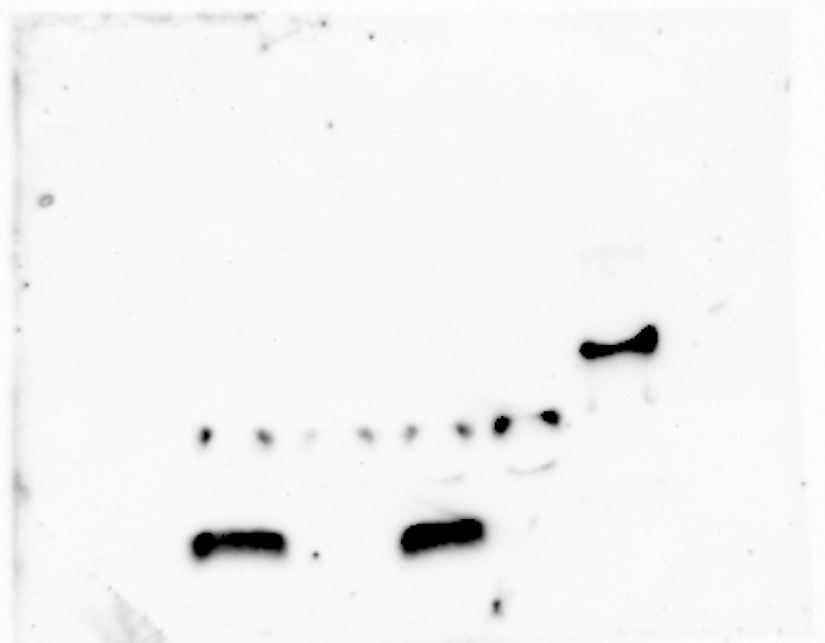

miPEP8

wt

mt

K

Kmt

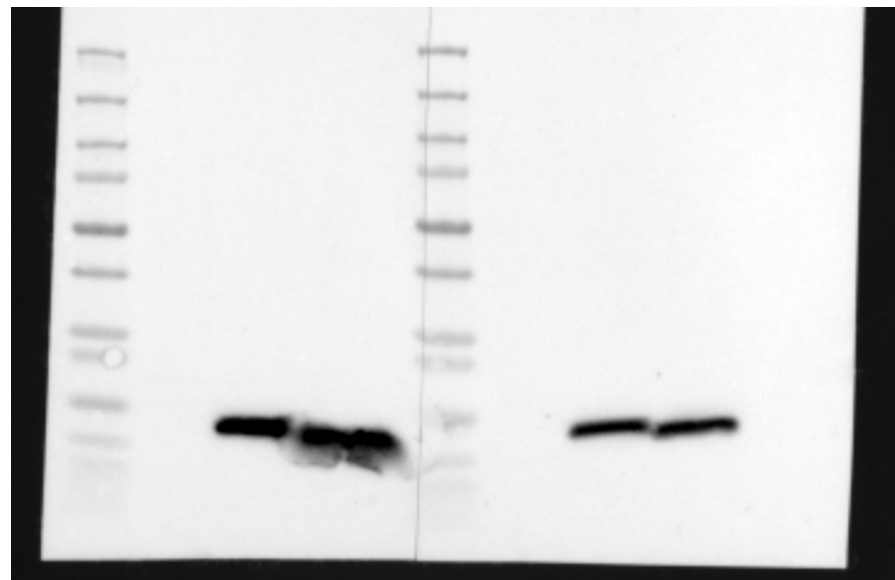

ctrl Atg1HA Atg1

ctrl Atg1HA Atg1

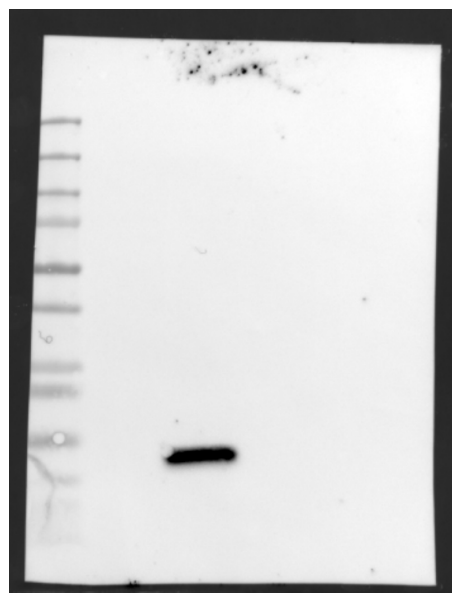

ctrl Atg1HA Atg1

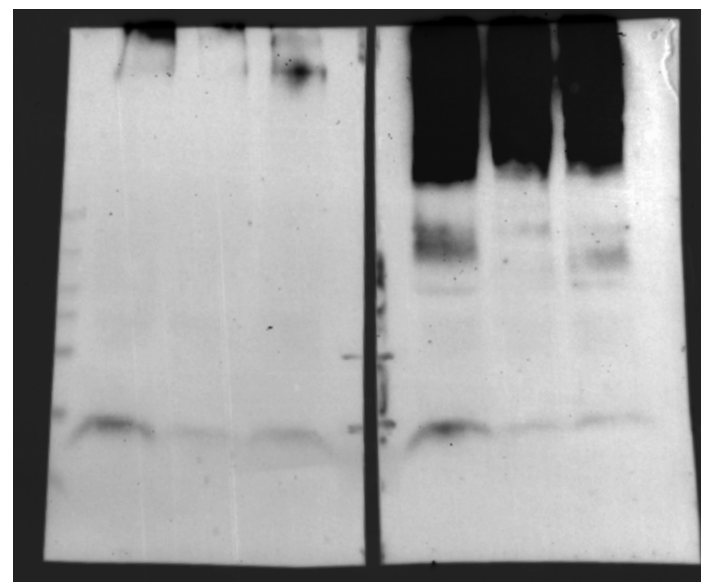

OE8 OE8mt ctrl

OE8 OE8mt ctrl

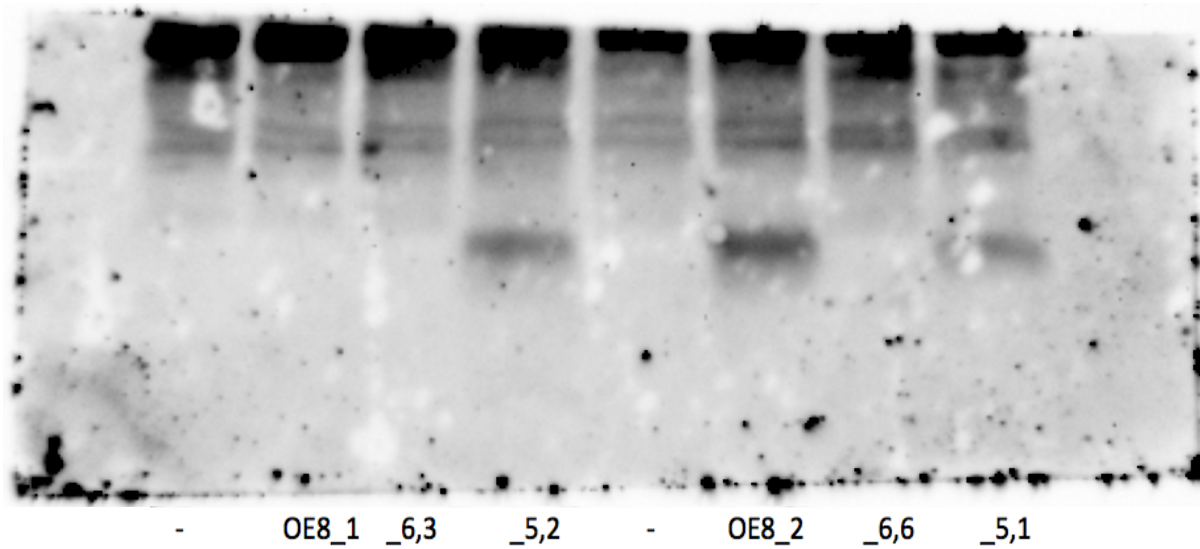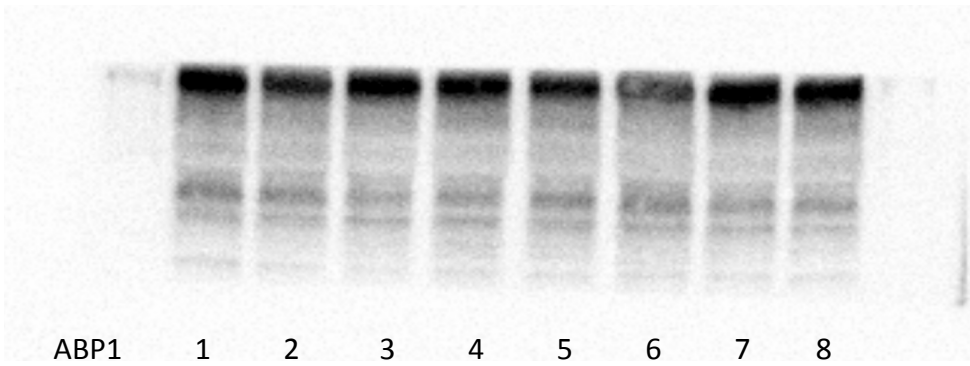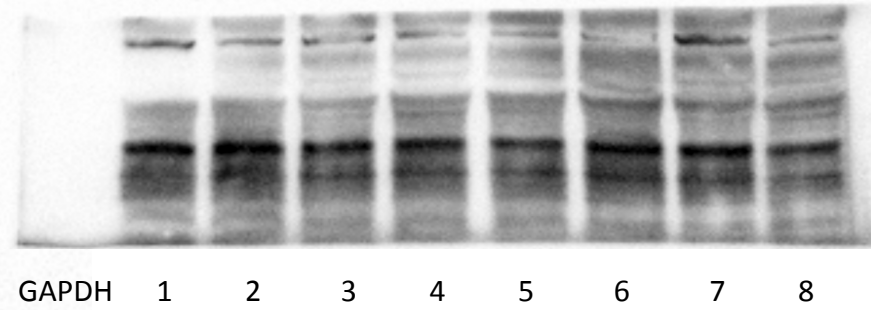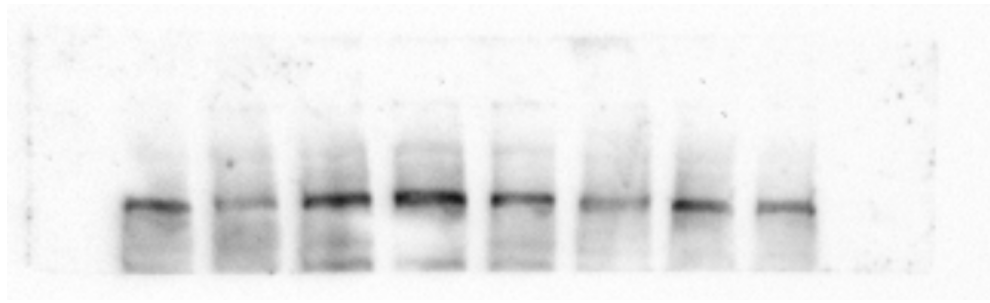

lanes 1,5 NT  
 lanes 2,6 OE miR8  
 lanes 3,7 OE miPEP8  
 lanes 4, 8 OE miPEP8m

Sra-1
